# Supplementary material for: A two-dimensional photonic crystal hydrogel biosensor for colorimetric detection of penicillin G and penicillinase inhibitors
Source: Royal Society of Chemistry journal article supplement (doi:10.1039/d0an01946a), 2020-11-03
Supplement: d0an01946a1.pdf [file d0an01946a1.pdf]

## Supplementary Information

### **Two-dimensional photonic crystal hydrogel biosensor for colorimetric detection of penicillin G and penicillinase inhibitor**

Changping Wang,<sup>a</sup> Fubing Xiao,<sup>\*a,b</sup> Qianshan Chen,<sup>a</sup> Shihong Wang,<sup>a</sup> Jun Zhou,<sup>a</sup> Zhaoyang Wu<sup>\*a</sup>

<sup>a</sup>State Key Laboratory of Chemo/Biosensing and Chemometrics, College of Chemistry and Chemical Engineering, Hunan University, Changsha, 410082, P. R. China. Email: [zywu@hnu.edu.cn](mailto:zywu@hnu.edu.cn)

<sup>b</sup>Hunan Province Key Laboratory of Typical Environmental Pollution and Health Hazards, College of Public Health, University of South China, Hengyang, 421001, P. R. China. Email: [xiaofubing2008@163.com](mailto:xiaofubing2008@163.com)

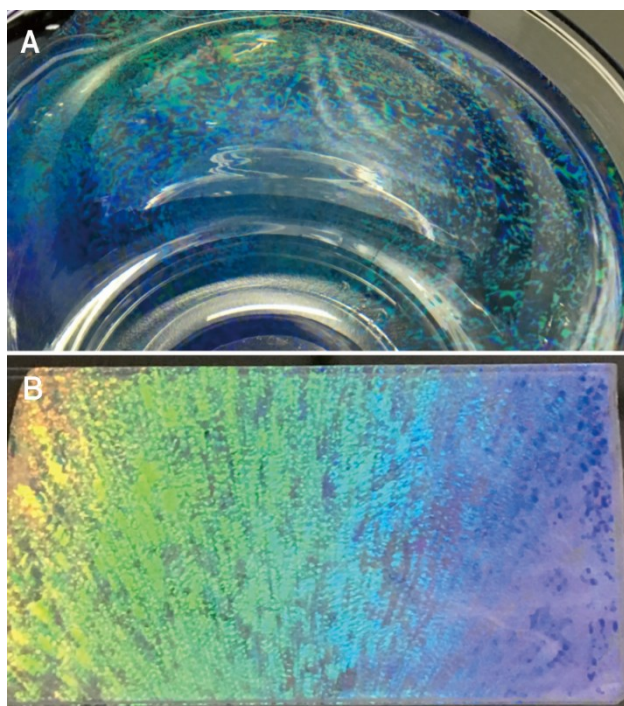

**Fig. S1** (A) PS nanoparticles self-assemble into 2DPC array on the water surface. (B) The 2DPC array on a clean glass slide.

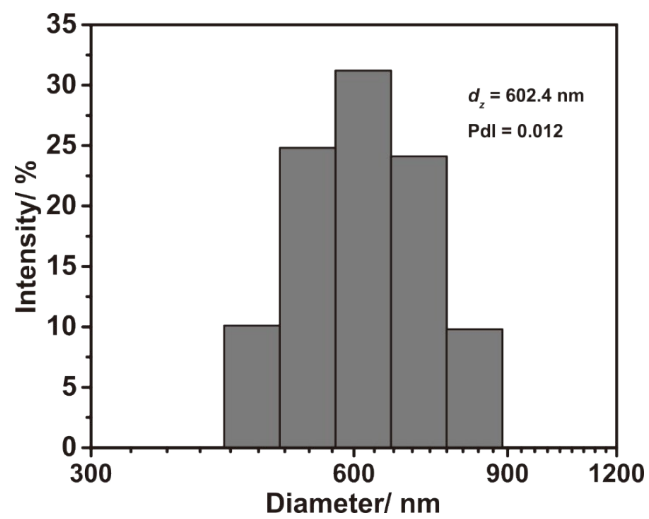

**Fig. S2** Particle size distribution diagram of PS microspheres.

**Table S1** Biosensors for the detection of penicillin G

| Bioreceptor   | Sensor array                                                  | Linear range      | LOD          | Ref.      |
|---------------|---------------------------------------------------------------|-------------------|--------------|-----------|
| Penicillinase | CNTs/enzyme-lipid LB                                          | 10 $\mu$ M-5 mM   | 10 $\mu$ M   | 1         |
| Penicillinase | Al-p-Si-SiO <sub>2</sub> -Ta <sub>2</sub> O <sub>5</sub> -TMV | 0.1-10 mM         | 50 $\mu$ M   | 2         |
| Penicillinase | BSA-GLA-P'nase                                                | 3-283 $\mu$ M     | 3 $\mu$ M    | 3         |
| Penicillinase | Single layer and bilayer PPy-P'nase                           | 7.5-146 $\mu$ M   | 0.3 $\mu$ M  | 4         |
| Penicillinase | Hybrid nanowire/nanoparticle array                            | 20-310 $\mu$ M    | 10.5 $\mu$ M | 5         |
| Penicillinase | Penicillinase modified TMV nanorods                           | 100 $\mu$ M-20 mM | 100 $\mu$ M  | 6         |
| Penicillinase | Dendrimer/carbon nanotube                                     | 5 $\mu$ M-25 mM   | 5 $\mu$ M    | 7         |
| Penicillinase | PAH/penicillinase EIS sensor                                  | 20 $\mu$ M-10 mM  | 20 $\mu$ M   | 8         |
| Penicillinase | 2DPCCH colorimetric sensor                                    | 1 $\mu$ M - 6 mM  | 1 $\mu$ M    | This work |

## References

- 1 F. A. Scholl, P. V. Morais, R. C. Gabriel, M. J. Schöning, J. R. Siqueira, L. Caseli, *ACS Appl. Mater. Interfaces*, 2017, **9**, 31054-31066.
- 2 A. Poghossian, M. Jablonski, C. Koch, T. S. Bronder, D. Rolka, C. Wege, M. J. Schöning, *Biosens. Bioelectron.*, 2018, **110**, 168-174.
- 3 F. Ismail, S. B. Adeloju, *Electroanalysis*, 2015, **27**, 1523-1531.
- 4 F. Ismail, S. B. Adeloju, A. N. Moline, *Electroanalysis*, 2014, **26**, 2607-2618.
- 5 Z. Li, C. Liu, V. Sarpong, Z. Gu, *Biosens. Bioelectron.*, 2019, **126**, 632-639.
- 6 C. Koch, A. Poghossian, M. J. Schöning, C. Wege, *Nanotheranostics*, 2018, **2**, 184-196.
- 7 J. R. Siqueira, M. H. Abouzar, A. Poghossian, T. S. Bronder, D. Rolka, C. Wege, M. J. Schöning, *Biosens. Bioelectron.*, 2009, **25**, 497-501.
- 8 M. H. Abouzar, A. Poghossian, J. R. Siqueira, O. N. Oliveira, W. Moritz, M. J. Schöning, *Phys. Status Solid A*, 2010, **207**, 884-890.
